# Supplementary material for: Essential role of Card11 in airway hyperresponsiveness in high-fat diet-induced obese mice
Source: PubMed Central journal article supplement (PMC11671588; doi:10.1038/s12276-024-01367-z), 2024-12-13

## SUPPLEMENTARY MATERIAL

### **Essential role of Card11 in airway hyperresponsiveness in high-fat diet-induced obese mice**

Hyun-Seung Lee, PhD<sup>1</sup>, Byung-Keun Kim, MD, PhD<sup>2</sup>, Suh-Young Lee, MD, PhD<sup>3</sup>, Hyuktae Kwon, MD, PhD<sup>4</sup>, Heung-Woo Park, MD, PhD<sup>3,5</sup>

<sup>1</sup>Biomedical Research Institute, Seoul National University Hospital, Seoul, Republic of Korea;

<sup>2</sup>Department of Internal Medicine, Korea University College of Medicine, Seoul, Republic of Korea;

<sup>3</sup>Department of Internal Medicine, Seoul National University Hospital, Seoul, Republic of Korea;

<sup>4</sup>Department of Family Medicine, Seoul National University Hospital, Seoul, Republic of Korea;

<sup>5</sup>Department of Internal Medicine, Seoul National University College of Medicine, Seoul, Republic of Korea

## **METHODS**

### **Phenotyping of control individuals and asthmatics**

All were adults aged  $\geq 19$  years, non-smokers or former smokers with smoking pack years  $< 10$ , and non-atopic (negative by skin prick test with for inhalant allergens). The control group had no previous history of asthma and smoking, and normal lung function (predicted value of forced expiratory volume in one second [FEV1]  $\geq 80\%$  and FEV1/forced vital capacity  $\geq 70\%$ ). The diagnosis of asthma was as follows: 1) presence of one or more of the following symptoms: dyspnea, cough, or wheezing, and 2) proven airway hyperresponsiveness (AHR) or airway reversibility. AHR was determined as positive when PC<sub>20</sub> (provocative concentration causing a 20% fall in FEV1) was less than 16 mg/mL in a bronchial provocation test using methacholine chloride, and airway reversibility was defined as an increase in FEV1  $\geq 12\%$  from baseline after inhalation of 400  $\mu\text{g}$  of salbutamol or four weeks of anti-inflammatory treatment (systemic and inhaled corticosteroids).

## SUPPLEMENTARY FIGURE LEGENDS

### Supplementary Fig. 1. Evaluation of changes in HFD-induced obese mice at each time point

a Body weight and epididymal white fat tissue. b Methacholine (Mch)-induced airway hyperresponsiveness (Mch 100 mg/ml) in each group (Y-axis represents cmH<sub>2</sub>O/mL/s). c-e Histological examination of the lung tissue (c, H&E stain, × 200; d, Masson's trichrome stain, × 400) and adipose tissue (e, H&E stain, × 200) in each group. All scale bars represent 100 μm. f, g Representative gating strategy and the frequency of neutrophil (Gr-1<sup>+</sup>CD11c<sup>-</sup> in CD11b<sup>+</sup>) from the lung tissue in each group. Five animals per group. Results are presented as mean ± standard deviation. #, differences in the HFD group (#P < 0.05 and ##P < 0.01; compared to 4 weeks). §, differences in the Chow group (§P < 0.05 and §§P < 0.01; compared to 4 weeks). \*, differences between the HFD and Chow group (\*P < 0.05 and \*\*P < 0.01). Statistical analysis followed by two-way ANOVA with Sidak's multiple comparisons test. Chow, normal chow diet; HFD, high-fat diet.

### Supplementary Fig. 2. The persistency of reduction in Card11<sup>+</sup>CD45<sup>+</sup> cells in mouse lung cells after *Card11* siRNA administration

a, b Gating plot and the frequency of Card11<sup>+</sup>CD45<sup>+</sup> in the lung cells from mice treated by control siRNA or *Card11* siRNA at each time point. The displayed percentage represents the population of Card11<sup>+</sup>CD45<sup>+</sup> in total cells. Five animals per group. Results are presented as mean ± standard deviation. ##P < 0.01 (control siRNA vs. *Card11* siRNA). Statistical analysis followed by two-way ANOVA with Sidak's multiple comparisons test. Si, siRNA.

### Supplementary Fig. 3. Evaluation of changes treated by control siRNA in HFD-induced obese mice at each time point

a Experimental protocol. b Body weight and epididymal white fat weight in each group. c Methacholine (Mch)-induced AHR (Mch 100 mg/ml) in each group (Y-axis represents cmH<sub>2</sub>O/mL/s). d The frequency of neutrophils (Gr-1<sup>+</sup>CD11c<sup>-</sup> in CD11b<sup>+</sup>) in the lung tissue. e The frequency of CD127<sup>+</sup>RORγt<sup>+</sup> ILC3s in the lung tissue. f The frequency of M1s (CD11c<sup>+</sup>CD206<sup>-</sup>) in CD11b<sup>+</sup> cells in the adipose tissue. g, h Histological examination of mouse lung (g, H&E stain, × 200) and adipose tissue (h, H&E stain, × 200). Five animals per group. Results are presented as mean ± standard deviation. \*P < 0.05, \*\*P < 0.01 (compared to the Chow group). Statistical analysis was performed using one-way ANOVA with Bonferroni's multiple comparisons test. Chow, normal chow diet; HFD, high-fat diet; si, siRNA.

**Supplementary Table 1. List of anti-mouse and anti-human antibodies for flow cytometry**

| <b>Product</b>                   | <b>Company</b> | <b>Clone</b>                            | <b>Order number</b> | <b>Dilution factor</b> |
|----------------------------------|----------------|-----------------------------------------|---------------------|------------------------|
| CARD11                           | Santa cruz     | A-4                                     | sc-166910 AF594     | 1:200                  |
| APC anti-mouse<br>Gr-1           | Biolegend      | RB6-8C5                                 | 108411              | 1:100                  |
| FITC anti-mouse<br>CD11c         | Biolegend      | N418                                    | 117306              | 1:100                  |
| FITC anti-mouse/human<br>CD11b   | Biolegend      | M1/70                                   | 101206              | 1:100                  |
| FITC anti-mouse<br>FceRIa        | Biolegend      | 01-Mar                                  | 134305              | 1:100                  |
| FITC anti-mouse<br>CD19          | Biolegend      | 6D5                                     | 115506              | 1:100                  |
| CD49, FITC                       | Thermo         | DX5                                     | 11-5971-82          | 1:100                  |
| CD3e, FITC                       | Thermo         | 145-2C11                                | 11-0031-82          | 1:100                  |
| F4/80, FITC                      | Thermo         | BM8                                     | 11-4801-85          | 1:200                  |
| BV711 anti-mouse<br>CD4          | Biolegend      | RM4-5                                   | 100557              | 1:200                  |
| BV421 anti-mouse<br>IL-17        | Biolegend      | TC11-18H10.1                            | 506926              | 1:100                  |
| Roryt, APC                       | Thermo         | AFKJS-9                                 | 17-6988-80          | 1:100                  |
| PE/cy7 anti-mouse<br>IL-7R       | Biolegend      | A7R34                                   | 135014              | 1:50                   |
| CD45, PerCP-Cy5.5                | Thermo         | 30-F11                                  | 45-0451-80          | 1:200                  |
| APC/cy7 anti-mouse<br>CD11c      | BD             | HL3                                     | 561241              | 1:100                  |
| Mouse CD206                      | R&D systems    |                                         | AF2535              | 1:250                  |
| Pro-IL-1 $\beta$ , PE/cy7        | Thermo         | NJTEN3                                  | 25-7114-82          | 1:200                  |
| Alexa Flur 700 anti-human CD16   | Biolegend      | 3G8                                     | 302026              | 1:50                   |
| FITC anti-human Lineage cocktail | Biolegend      | UCHT1;HCD14;3G<br>8;HIB19,<br>2H7;HCD56 | 348801              | 1:20                   |
| FITC anti-human CD11c            | Biolegend      | 3.9                                     | 301604              | 1:50                   |
| FITC anti-human CD123            | Biolegend      | 6H6                                     | 306014              | 1:50                   |
| PE/cy7 anti-human CD127          | Biolegend      | A019D5                                  | 351320              | 1:50                   |

|                               |                |         |        |       |
|-------------------------------|----------------|---------|--------|-------|
| APC anti-human CD117          | Biolegend      | 104D2   | 313206 | 1:50  |
| BV 711 anti-humanCD336(NKp44) | BD Biosciences | p44-8   | 744303 | 1:50  |
| PE anti-human ROR $\gamma$ t  | BD Biosciences | Q21-559 | 563081 | 1:100 |
| FITC anti-human IL-1 $\beta$  | Biolegend      | H1b-98  | 511705 | 1:100 |

## # Isotype antibody

| Product                                                               | Company        | Clone     | Order number | Dilution factor |
|-----------------------------------------------------------------------|----------------|-----------|--------------|-----------------|
| APC Rat IgG2b, $\kappa$ Isotype Control                               | Biolegend      | RTK4530   | 400611       | 1:1000          |
| FITC Armenian Hamster IgG Isotype Control                             | Biolegend      | HTK888    | 400905       | 1:1000          |
| FITC Rat IgG2b, $\kappa$ Isotype Control                              | Biolegend      | RTK4530   | 400633       | 1:1000          |
| Rat IgM Isotype Control, FITC                                         | Thermo         | eBRM      | 11-4341-82   | 1:1000          |
| Brilliant Violet 421 <sup>TM</sup> Rat IgG1, $\kappa$ Isotype Control | Biolegend      | RTK2071   | 400429       | 1:500           |
| Rat IgG1 $\kappa$ Isotype Control, APC                                | Thermo         | eBR2a     | 17-4321-81   | 1:1000          |
| PE/Cy7 Rat IgG2a, $\kappa$ Isotype Control                            | Biolegend      | RTK2758   | 400521       | 1:1000          |
| APC-Cy <sup>TM</sup> 7 Hamster IgG1, $\lambda$ 1 Isotype Control      | BD Biosciences | G235-2356 | 561206       | 1:1000          |
| Donkey Anti-Goat IgG H&L (Alexa Fluor 647)                            | Abcam          |           | Ab150131     | 1:1000          |
| Rat IgG1 kappa Isotype Control, PE-Cyanine7                           | Thermo         | eBRG1     | 25-4301-82   | 1:1000          |
| FITC Mouse IgG2b, $\kappa$ Isotype Control                            | Biolegend      | MG2b-57   | 401205       | 1:1000          |
| FITC Mouse IgG1, $\kappa$ Isotype Control                             | Biolegend      | MOPC-21   | 400107       | 1:1000          |
| PE/Cy7 Mouse IgG1, $\kappa$ Isotype Control                           | Biolegend      | MOPC-21   | 400125       | 1:1000          |
| APC Mouse IgG1, $\kappa$ Isotype Control                              | Biolegend      | MOPC-21   | 400119       | 1:1000          |

|                                     |                |        |        |        |
|-------------------------------------|----------------|--------|--------|--------|
| PE Mouse IgG2b, κ Isotype Control   | BD Biosciences | 27-35  | 555058 | 1:1000 |
| FITC Mouse IgG2b, κ Isotype Control | Biolegend      | MPC-11 | 400309 | 1:1000 |

Blank indicates polyclonal antibody

**Supplementary Table 2. Membership genes belong to 4 clusters identified in clustering analysis of time-series gene expressions in adipose and lung tissue from HFD-induced obese mice**

| Adipose tissue           | Membership genes                                                                                                                                                                                                                                                                                                                                                                                                                                                                                                                                                                                                                                                                                                                                                                                                                                                                                                                                                                                                                                                                                                                                                                                                                                                                                                                                                                                                                                                                                                                                                                                                                                                                                                                                                                                                                                                                                                                                                                                                                                                                                                                                                                                                                                                                                                                                                                                                                                                                                                                                                                                                                                                                                                                                                                                                                                                                                                                                                                                                                                                                                                              |
|--------------------------|-------------------------------------------------------------------------------------------------------------------------------------------------------------------------------------------------------------------------------------------------------------------------------------------------------------------------------------------------------------------------------------------------------------------------------------------------------------------------------------------------------------------------------------------------------------------------------------------------------------------------------------------------------------------------------------------------------------------------------------------------------------------------------------------------------------------------------------------------------------------------------------------------------------------------------------------------------------------------------------------------------------------------------------------------------------------------------------------------------------------------------------------------------------------------------------------------------------------------------------------------------------------------------------------------------------------------------------------------------------------------------------------------------------------------------------------------------------------------------------------------------------------------------------------------------------------------------------------------------------------------------------------------------------------------------------------------------------------------------------------------------------------------------------------------------------------------------------------------------------------------------------------------------------------------------------------------------------------------------------------------------------------------------------------------------------------------------------------------------------------------------------------------------------------------------------------------------------------------------------------------------------------------------------------------------------------------------------------------------------------------------------------------------------------------------------------------------------------------------------------------------------------------------------------------------------------------------------------------------------------------------------------------------------------------------------------------------------------------------------------------------------------------------------------------------------------------------------------------------------------------------------------------------------------------------------------------------------------------------------------------------------------------------------------------------------------------------------------------------------------------------|
| Cluster 1<br>(447 genes) | <p><i>Aacs; Abca5; Acacb; Acadsb; Ace2; Ackr4; Acsm3; Acsm5; Acss3; Acta1; Acvr1c; Adrb3; AI480526; Alad; Aldh1a1; Aldh2; Aldh5a1; Aldh6a1; Angpt1; Ankef1; Ankrd29; Aox3; Apbb3; Apcdd1; Apoll1b; Apold1; Ar; Arhgap42; Arhgef28; Arhgef9; Arrdc2; Arrdc3; Art3; Ascl1; Asns; Atp10d; Atp2b4; Atp6v0e2; Auts2; B130011K05Rik; B230208H11Rik; B430319H21Rik; Bag4; Bbs2; BC035947; Bcam; Bcat2; Bche; Bckdha; Bckdhb; Birc2; Bmp4; Bnc2; Bphl; Btbd8; Btc; C2; C6; C7; C920006O11Rik; Ccbe1; Cd164l2; Cdc37l1; Cdo1; Ceer2; Cenpv; Ces1d; Ces1f; Cfd; Chchd6; Chdh; Chrdl1; Chrnbl; Cldn22; Clmn; Clpx; Clstn2; Cnr1; Cnst; Cobll1; Cp; Crebrf; Crls1; Csad; Cuedc1; Cyp27a1; Cyp2d22; Cyp2e1; Cyt1l; D230025D16Rik; D3Ert4751e; D730048I06Rik; Dbt; Defb20; Defb48; Dennd2d; Dennd5b; Dgka; Dgkb; Dhkdl1; Dkc1; Dmrt2; Dnah3; Dnajb5; Dpyd; Drd1; Dusp16; Dusp18; Dysf; Ebf2; Echdc2; Echdc3; Echs1; Efcab7; Ehbpl1; Eif4ebp3; Eml5; Enpp2; Ephb4; Ephx2; Epm2a; Ercc5; Eri2; Eva1c; F11r; Fam120aos; Fam120c; Fam132a; Fam13a; Fam150b; Fam180a; Fam188b; Fam214a; Fam35a; Fbxo31; Fbxo45; Fcamr; Fdx1; Fgf10; Fgfr2; Fgfr3; Fign; Firre; Fmo1; Fmo5; Foxc1; Fv1; Fyco1; Gabbr1; Gata6; Gdap10; Gde1; Ggnbp2os; Glb1l2; Golgb1; Gpat4; Gphn; Gpr165; Gpx3; Gpx5; Grhl1; Grhpr; Gsta4; Gstk1; Gstt1; Gulp1; Gzfl; H2-Ke6; H2-M9; Hey2; Hibadh; Hibch; Hnrnpu; Hoxa4; Hoxa5; Hoxa7; Hoxb2; Hoxc8; Hpgd; Hsd17b10; Hsf3; Iars2; Id1; Ift57; Ift88; Il17re; Inmt; Insr; Iqcb1; Irak1bp1; Isl1; Isoc2a; Itm2a; Jag2; Kalrn; Kat2b; Kens3; Kctd15; Kctd17; Kdsr; Klhl11; Klhl2; Lcn8; Lcn9; Ldhh; Lekr1; Lncpint; Lnx1; LOC100862043; LOC102642832; Lrba; Lvrn; Lypd8; Lyplal1; Maob; Map3k5; Map3k7cl; Mapt; Mc5r; Mccc1; Mccc2; Med12l; Meis1; Meis2; Met; Mettl20; Mettl7a1; Mgst1; Mical3; Micu3; Mir130b; Mir1898; Mir194-2; Mir3074-2; Mir32; Mir383; Mir466h; Mir872; Mir99a; Mira; Mrgprh; Mrps34; Muc16; Myh10; Myh11; Myo1b; Nampt; Ncoa1; Ndr1; Ndufa6; Ndufb11; Negr1; Neo1; Net1; Notch1; Noval; Nr1d1; Nrbp2; Nrg4; Oard1; Odf2l; Olfr1015; Olfr1033; Olfr1100; Olfr1158; Olfr1448; Olfr175-ps1; Olfr198; Olfr235; Olfr498; Olfr550; Olfr875; Opn3; Orm3; Osbpl11; Osep1; Osr1; Pabpc6; Paesin3; Paqr3; Park2; Pck1; Pesk6; Pde1a; Pde3b; Pdk2; Pdpk1; Peli2; Penk; Per3; Pex3; Pfkfb1; Phc1; Phf2; Phkg1; Phpt1; Phyh; Phyhd1; Pi15; Pkhd1l1; Pla2g12a; Plag1; Platr14; Plpp6; Pm20d2; Pmvk; Pnlsr; Podn; Polr3gl; Pon1; Porcn; Ppa1; Ppl; Ppp2r3a; Ppp4r4; Prdx6; Prex2; Prkd1; Prodh; Prrg3; Pxmp2; Pygl; Rad9b; Ralgapa2; Ranbp9; Rasl1b; Rassf6; Raver2; Rbm4b; Rbp7; Reep6; Reln; Retn; Rev1; Rgma; Rgs7; Rhbdd3; Rhbdll1; Rhobtb1; Rhou; Ripk4; Rnpc3; S100a1; Scara5; Scarna3a; Sccpdh; Scn7a; Scp2; Sctr; Sdr39u1; Sema3c; Sema5a; Sfxn1; Sh3d21; Sik3; Slc1a1; Slc1a3; Slc20a2; Slc25a23; Slc25a35; Slc25a44; Slc2a3; Slc38a5; Slc43a1; Slc44a3; Smim1; Snhg12; Snora15; Snora17; Snora28; Snora30; Snora34; Snora44; Snora52; Snora69; Snord4a; Snord59a; Snord66; Snord90; Sntg2; Sores1; Sort1; Sox6os; Spata22; Sqrld; Sra1; St6galnac5; Steap2; Stim1; Stx1b; Suclg2; Sugct; Sult1e1; Tcaim;</i></p> |



*Tead1; Tef; Thap6; Thrsp; Timm21; Timp4; Tle1; Tmeff1; Tmem134; Tmem147os; Tmem223; Tmem56; Tmem88b; Tmtc1; Tpmt; Trbv12-2; Trit1; Trpc1; Tshz2; Tst; Ttc21b; Ttc8; Txlng; Uimc1; Upk1b; Urb1; Usp53; Usp54; Vegfa; Vit; Vmn2r44; Vnn1; Vnn3; Vps13a; Wdr35; Wdsub1; Yes1; Zbtb10; Zbtb11os1; Zbtb20; Zc3h7b; Zfand1; Zfhx4; Zfp462; Zfp507; Zfp512b; Zfp609; Zfp809; Zhx2; Znfx1; Zrsr1; Zscan4e; Zyg11a*

Cluster 2  
(767 genes)

*AB124611; Abcb4; Abcg1; Abhd12; Acer3; Actm1; Actr3; Adam17; Adam19; Adam22; Adam8; Adcy3; Adcy7; Adgre1; Adssl1; AF251705; Ahnak2; AI413582; AI662270; AI839979; Aim2; Akr1b8; Alcam; Aldh3b1; Alox5ap; Alpk1; Ankdd1a; Anpep; Anxa4; Ap2m1; Apaf1; Aph1c; Apobec1; Aprt; Arap1; Arhgap10; Arhgap11a; Arhgap17; Arhgap19; Arhgap22; Arhgap25; Arhgap30; Arhgap6; Arhgap9; Arhgdb; Arhgef6; Arl11; Arntl; Arpc5; Arrb2; As3mt; Asah1; Asb4; Asf1b; Aspm; Atad2; Atf3; Atp13a2; Atp1a3; Atp6ap2; Atp6v1a; Atp6v1b2; Atp6v1c1; Atp8b4; AU020206; AU022793; B4galt5; B4galt6; B4galt7; Bax; BC005537; BC028528; BC055324; Bcl2a1b; Bcl2a1d; BE692007; Bin2; Birc5; Blm; Blnk; Blvra; Bmper; Brca1; Brip1; Bst1; Btk; Bub1; Bub1b; C1qa; C1qb; C1qc; C330027C09Rik; C3ar1; C430042M11Rik; C5ar1; C5ar2; C920009B18Rik; Cacna1a; Calhm2; Camk1d; Capg; Capza1; Casc5; Casp1; Casp3; Cass4; Cbfb; Cbl; Cbr3; Ccdc88a; Ccl3; Ccl5; Ccna2; Ccnb1; Ccnb2; Ccr3; Ccr5; Ccrl2; Cd180; Cd200r1; Cd200r4; Cd22; Cd300a; Cd300lb; Cd300ld; Cd37; Cd44; Cd48; Cd53; Cd68; Cd72; Cd83; Cd84; Cd9; Cdc42se1; Cdc42se2; Cdca5; Cdca7l; Cdca8; Cdk1; Cdk15; Cdk18; Cdk20; Cdkn3; Cdt1; Ceacam16; Cenpa; Cenpe; Cenpf; Cenpi; Cenpl; Cenpn; Cep290; Cep55; Cerk; Ckap2; Ckap4; Ckb; Clec12a; Clec4a1; Clec4a2; Clec4a3; Clec4d; Clec5a; Clec7a; Clic1; Cln3; Cma1; Cmtm3; Cmtm7; Cnr2; Colgalt1; Coro1a; Coro1c; Cotl1; Cpa3; Cpe; Cpxm1; Creg1; Csf1r; Csf2ra; Csf2rb2; Csk; Cstb; Ctsa; Ctsh; Ctsk; Ctsl; Ctss; Cxcl14; Cxcl16; Cxcr4; Cyb5r4; Cyba; Cybb; Cyfip1; Cyfip2; Cyth4; D330050G23Rik; Dagleb; Dapp1; Dbf4; Dck; Dclre1c; Dcstamp; Ddias; Dennd4b; Dennd4c; Depdc1a; Dgkz; Dhrs9; Diaph3; Dlg3; Dlgap5; Dnase11l; Dnmt1; Dnmt3a; Dnmt3aos; Dock10; Dock2; Dok1; Dpep2; Dpp7; Dpy19l3; Dtx4; Dusp7; E2f8; Ebi3; Ect2; Efh2; Efr3b; Ehd4; Eid3; Elmo1; Elmo2; Emp3; Eno2; Entpd1; Eps8; Esco2; Evi2a; Evl; Eya4; F10; F7; Fabp7; Fam105a; Fam111a; Fam122b; Fam198b; Fam83f; Fam96a; Fat3; Fblim1; Fcer1a; Fcer1g; Fcgr1; Fcgr3; Fcgr4; Fermt3; Fgd3; Fgd4; Fgd6; Fgf7; Fhl2; Fignl1; Fmn1; Fnip2; Fos; Frmd4a; Frmd4b; Frrs1; Ftl1; Fundc1; Fxyd5; Fyb; Gabra3; Galc; Galns; Galnt6; Galnt7; Gas2l3; Gas7; Gatm; Gdf3; Gdpd1; Gga3; Gins1; Gla; Gliplr1; Glrx; Gmip; Gmn; Gnal3; Gnpdal; Got1; Gpm6b; Gpr137b; Gpr137b-ps; Gpr176; Gpr183; Gpr34; Gpr50; Gpr65; Gpsm3; Grn; Gsap; Gusb; H2-M2; H2-T23; Hacd4; Haver2; Hck; Hcls1; Heatr5a; Hells; Hexa; Hexb; Hgf; Hilpda; Hist1h1b; Hist1h2ag; Hist1h2bg; Hist1h4i; Hist1h4m; Hist2h2ab; Hist2h2ac; Hk3; Hmgal-rs1; Hmnr; Hmox1; Hpcall; Hpgds; Hpse; Hsph1; Htr2b; Id2; Ifi30; Ifnar1; Igf2bp2; Igf2r; Igkv3-2; Igsf6; Ikbke; Ikzf1; Il10ra; Il10rb; Il1rn; Il27ra; Il7r; Incenp; Inpp5d; Iqgap1; Irf5; Irf8; Itga4; Itgad; Itgam; Itgav; Itgax; Itgb2; Itsn1; Kcnab2; Kcnj2; Kcnk6; Kenn4; Kif11; Kif15; Kif20a; Kif20b; Kif23; Kif3b; Klhl6; Knstrn; Kntc1; Lacc1; Lair1; Laptm5; Lat2; Layn; Lcp2; Ldlrap1; Lgmn; Lig1; Lilr4b; Lilrb4a; Lin9; Lipa; LOC100503338; LOC102638993; Lpar5; Lpxn; Lrmp; Lrp12; Lrrc25; Lst1; Lum; Ly86; Ly9; Ly96; Lyn; Lys2; Mad2l1; Madd; Mafb; Mamdc2; Mamld1; Man1c1; Man2b1; Manba; Maoa; Map4k1; Mastl; Mb21d1; Mcm3; Mcm4; Mcm5; Mcm6; Mcoln2; Mcpt4; Melk; Metrnl; Mfsd1; Mfsd11; Mfsd12; Mfsd7b; Mgat2; Mgat5; Milr1; Mir142hg; Mir342; Mir669n; Mis18bp1; Mitf; Mki67; Mkl1; Mmp12; Mmp13; Mmp14; Mmp19; Mmp2; Mmp3; Mocos; Mpeg1; Mrgprb1; Mrgpre; Ms4a14; Ms4a4b; Ms4a6c; Ms4a6d; Ms4a7; Msr1; Mtrf1; Mtss1; Muc13; Mup1; Mup13; Mup14; Mup15; Mup16; Mup18; Mup19; Mup2; Mup7; Mup8; Mybl1; Myd88; Myh15; Myo1e; Myo1f; Myo1g; Myo9b; Myof; Mypopos; Naip6; Ncapg; Ncaph; Nceh1; Ncf1; Ncf4; Nckap1l; Nes1; Ndc80; Necap2; Neurl3; Nfam1; Nfasc; Nfkbid; Nfya; Nipa2; Nlrc3; Nlrc4; Nostrin; Npas2; Npc1; n-R5s26; Nrcam; Nrp2; Nuak2; Nuf2; Nusap1; Nutf2; Oas1g; Oas1l; Oit3; Olfr110; Olfr111; Olr1; Osbpl3; Osbpl8; P2rx4; P2rx7; P2ry14; P2ry6;*

*Panx1; Pbk; Pcna; Pcolce; Peak1os; Phf20; Pi4k2a; Pianp; Pik3ap1; Pik3cd; Pik3cg; Pik3r5; Pip4k2a; Pirb; Pitpnc1; Pkib; Pla2g15; Pla2g7; Plagl2; Plau; Pld3; Plek; Plekxm2; Plekxm3; Plekxm1; Plekho1; Plekho2; Plin2; Plk1; Plk2; Plk4; Pltp; Plxna1; Plxnb2; Plxnc1; Pole; Pole2; Polh; Prc1; Prcp; Prex1; Prim1; Prim2; Prkcb; Prkcd; Prr11; Prune2; Psd4; Pstpip1; Ptafr; Ptchd1; Ptgfrn; Ptgr1; Ptpn6; Ptpn7; Ptprc; Ptpro; Qpct; Rab11fip5; Rab31; Rab3il1; Rab7b; Rab8b; Rac2; Racgap1; Rasa1; Rasa4; Rasal3; Rassf3; Rassf4; Rassf8; Rbpsuh-rs3; Rel; Renbp; Repts2; Rgs1; Rgs10; Rgs18; Rhog; Rhoh; Rnaseh2b; Rnh1; Ror1; Rpf2; Rps6ka1; Rps6ka2; Rrm1; Rrm2; Rufy3; S100a4; S1pr2; Sap30; Sash3; Sass6; Scamp5; Scep1; Sdc3; Sdcbp; Selplg; Serpinb6b; Serpinb9b; Sh2d1b1; Sh3bgrl3; Sh3bp2; Sh3pxd2b; Shcbp1; Shisa5; Shisa6; Shtn1; Siglec1; Sirpa; Sirpb1a; Sirpb1b; Ska3; Skap2; Sla; Slamf7; Slamf8; Slc11a1; Slc15a3; Slc15a4; Slc18a1; Slc25a12; Slc25a24; Slc25a43; Slc35f6; Slc37a2; Slc38a1; Slc39a10; Slc40a1; Slc43a2; Slc6a6; Slc6a8; Slc7a7; Slc9a4; Slc9a9; Slco2b1; Slfn2; Slfn9; Smap2; Smc2; Sned1; Snord19; Snord96a; Snx20; Snx24; Snx27; Snx30; Snx5; Snx8; Soat1; Spag5; Spc25; Spdl1; Specc1; Spi1; Spred1; Srxn1; Ssc5d; St18; St8sia4; Stab1; Stac2; Stard3; Stard8; Steap3; Stmn1; Stra6l; Stxbp3; Syk; Syng1; Tacc3; Tagln2; Taok3; Tbxas1; Tcirg1; Tfec; Tfr2; Tgfb1; Tgif1; Themis2; Ticam2; Ticrr; Tifa; Tifab; Timp1; Tk1; Tlr1; Tlr13; Tlr2; Tlr6; Tlr7; Tlr8; Tm4sf19; Tm6sf1; Tmem104; Tmem106a; Tmem165; Tmem173; Tmem202; Tmem206; Tmod1; Tnf; Tnfai2; Tnfai8l2; Tnfrsf11a; Tnfrsf1b; Tnfrsf26; Tnip3; Tns3; Top2a; Tpcn2; Tpra1; Tpsb2; Tpx2; Trem2; Trerf1; Ttk; Tuba1c; Tubb5; Tubb6; Txnrd1; Tyrobp; Uap1l1; Ubash3b; Ube2c; Ucp2; Uhrf1; Ulbp1; Unc93b1; Vamp7; Vat1; Vav1; Vav3; Vipas39; Vsig4; Vsig8; Was; Wdfy4; Wdr1; Wdr91; Weel; Wfs1; Wrub; Xylt1; Zc3h12d; Zdhhc14; Zfp273; Zfp82; Zfp850; Znf41-ps; Zranb3; Zwilch*

|                          |                                                                                                                                                                                                                                                                                                                                                                                                                                                                                                                                                                                                                                                                                                                                                                                                                                                                                                                                                                                                                                                                                                                                                                                                                                                                                                                                                                                                                                                                                                                                                                                                                                                                                                                                                                                                                                                                                                                                                                                                                                                                                                                                                                                                                                                                                                                                                                                                                                                                                                                                                                                                                                                                                                                                                                                                                                                                                                      |
|--------------------------|------------------------------------------------------------------------------------------------------------------------------------------------------------------------------------------------------------------------------------------------------------------------------------------------------------------------------------------------------------------------------------------------------------------------------------------------------------------------------------------------------------------------------------------------------------------------------------------------------------------------------------------------------------------------------------------------------------------------------------------------------------------------------------------------------------------------------------------------------------------------------------------------------------------------------------------------------------------------------------------------------------------------------------------------------------------------------------------------------------------------------------------------------------------------------------------------------------------------------------------------------------------------------------------------------------------------------------------------------------------------------------------------------------------------------------------------------------------------------------------------------------------------------------------------------------------------------------------------------------------------------------------------------------------------------------------------------------------------------------------------------------------------------------------------------------------------------------------------------------------------------------------------------------------------------------------------------------------------------------------------------------------------------------------------------------------------------------------------------------------------------------------------------------------------------------------------------------------------------------------------------------------------------------------------------------------------------------------------------------------------------------------------------------------------------------------------------------------------------------------------------------------------------------------------------------------------------------------------------------------------------------------------------------------------------------------------------------------------------------------------------------------------------------------------------------------------------------------------------------------------------------------------------|
| Cluster 3<br>(365 genes) | <p><i>Abhd15; Abhd3; Acaca; Acad11; Acat1; Acot4; Adamts1; Adamts9; Adhfe1; Adig; Adipoq; Adipor2; Adnp2; Adrb2; AF357399; Ager; Agpat9; Agt; Ahcyl2; AK157302; Akap7; Alas2; Aldh11l; Aldh7a1; Amd1; Amd2; Amy1; Amy2a5; Aox1; Apoc1; Appbp2; Arl4a; Arl4d; Atl2; Atp1a2; Atp5l; Atraid; Atnx7; B3gal2; B430010I23Rik; B930094E09Rik; Bag1; BB123696; Bmp2; Bnip3; Brpf1; Brpf3; C030006K11Rik; C730002L08Rik; Car1; Car5b; Caskin2; Ccbl2; Ccdc69; Ccdc71l; Ccnj; Cdh23; Cdk5rap1; Cebpdl; Chd7; Chpt1; Chst1; Cisd1; Clic5; Clpb; Clpp; Cluh; Cnm2; Cpeb2; Cry2; Csta1; Ctdspl; Cyb5a; Cyp2f2; Cypt8; D10Jhu81e; Dclre1b; Dcst1; Dcst2; Dctn3; Ddit4; Ddrgk1; Ddt; Dennd3; Dgat1; Dhdh; Disp2; Dnajc21; Drap1; Dtna; Dusp8; E030003E18Rik; Eci1; Eci3; Eepd1; Ehhadh; Eif4ebp1; Eif4ebp2; Elane; Epas1; Epha2; Exd1; Fah; Fam101b; Fam160a1; Fam195a; Fam204a; Fasn; Fbxl4; Fbxo21; Fermt2; Ffar4; Fgf2; Fhl5; Fitm2; Fkbp5; Flad1; Flt1; Foxo1; Frrs1l; Ganc; Gatb; Gbe1; Gcgr; Glt28d2; Gnai1; Gnb5; Gpam; Gpd2; Gprc5a; Gpt2; Grem2; Gsta3; Gstz1; Gys1; H1fx; H6pd; Hacl1; Hbb-bh1; Hcrtr2; Hdx; Hecw2; Heph; Hif3a; Hint2; Hk2; Hmces; Hoxc4; Hsd11b1; Hspb8; Igf2; Igkv12-47; Il15ra; Il17rc; Imm21; Inafm2; Inca1; Irs1; Isca1; Itgb1bp1; Ivd; Kcnj15; Kctd2; Klb; Klf15; Klf9; Klhdc8b; Krtap31-2; Lamp3; Larplb; Larpl4; Lgals12; Lin52; Lipe; LOC102636563; LOC105243148; LOC105243404; LOC105244007; Lonp2; Lpin1; Lppos; Lrfn4; Lrig1; Lzts2; Mall; Map3k6; Map4k2; Map6d1; Mapk6; Mbd1; Mcc; Mgst3; Micall1; Mir215; Mir218-2; Mir26a-1; Mir3067; Mir694; Mknk2; Mlxipl; Mmp9; Mocs1; Mogat1; Mpst; Mut; Myrip; Ncam2; Ndufb8; Ndufs2; Ndufv1; Nfia; Nkain4; Nmb; Nnat; Nod2; Nos3; Nova2; Npdc1; Npr2; Nr1i3; Nrip1; Nts; Nudt12; Nudt18; Ogn; Olfr1026; Olfr1232; Olfr1263; Olfr1431; Olfr693; Oplah; Osgepl1; Ovgp1; P2rx1; Palm; Pccb; Pcx; Pdha1; Pdzd2; Pdzrn3; Peg13; Peli3; Pex11a; Pfkfb3; Pgm2; Phldb1; Phrf1; Phykpl; Pkdec; Plekhf1; Plin4; Pln; Plppr3; Plxna2; Pm20d1; Pnpla3; Poldip2; Por; Ppara; Ppm1m; Ppp1r1a; Ppp1r3c; Ppp1r3e; Ppp1r9a; Ppp2r1b; Ppp2r2d; Prkaa2; Prlr; Proca1; Psg29; Ptp4a1; Ptpn11; Ptpn14; Ptpn4; Ptpnd; Ptpnm; Pygb; Pygo1; Rab34; Rapgef1; Rapgef3; Rasa2; Rbms2; Rbp4; Rcl1; Retnla; Retsat; Rgs7bp; Rnf144b; Rpl27a-ps2; Rufy4; Rxra; Samm50; Scgb1a1; Scn3b; Sdhaf1; Sema3a; Sema4c; Serpina3b; Serpina3j; Setd1a; Sft2d3; Sftpa1; Sftpc; Sh2b2; Sh3glb2; Sh3pxd2a; Siglech; Sik2; Slc22a23; Slc25a16; Slc25a33; Slc2a12; Slc2a13; Slc2a4; Slc35e4; Slc5a6; Slc6a4; Smim19; Smkr-ps; Smoc1; Smok3c; Snhg11; Snrk; Snta1; Sntb1; Sorbs1; Sowahe; Sox5it; Sox6; Sox7; Stc1; Stfa21l; Syde2; Syn2; Syt14; Tab3; Taf9b; Tagln; Tcf15; Tead4; Thbd; Thra; Thrb; Thumpd1; Timd4; Tiparp; Tmem143; Tmem243; Tns1; Tomm6os; Trap1; Trav7d-5; Trim32; Tspo; Txnrd3; Ube2o; Uck1; Vegfb; Vmn1r67; Vprbp; Zcchc14; Zfand3; Zfp503; Zswim7</i></p> |
| Cluster 4<br>(233 genes) | <p><i>Abr; Adh6b; Aldh18a1; Aldh1a2; Ammccr1; Angptl1; Ap1s2; Ap1s3; Aplnr; Apol8; Arhgap39; Atp1a1; Atp6v0a1; Atp6v0d2; B430212C06Rik; B4galnt1; Bear3; C2cd2; Cacna1d; Cadm1; <b>Card11</b>; Casq1; Ccdc18; Cck; Ccl2; Ccl7; Ccl8; Ccnd1; Cd300lf; Cd52; Cdc25c; Cdca3; Cdk6; Cdkl4; Cfi; Ciita; Cilp; Cit; Cklf; Clec10a; Clec4b1; Clspn; Col12a1; Col1a1; Col6a1; Col6a2; Col6a3; Cpt1a; Cysltr1; Dab2; Dcbl2; Dclcl1; Dah1; Dhcr7; Dna2; Dock8; Dot1l; Dppa4; Dse; Dtl; Duoxa1; Ear2; Egr2; Emb; Entpd7; Ephb2; Eya1; F2r; Fam134b; Fam20c; Fam26f; Fam83d; Fanci; Fen1; Ffar2; Fgf13; Fgr; Fhdc1; Fkbp1b; Frk; Gk; Glt; Gpnm; Gpr35; Grid1; Gtse1; H2-Aa; H2-Ab1; H2-DMA; H2-DMb1; H2-Eb1; Hdac9; Heph11; Hist1h2ab; Hist1h2af; Hist1h2an; Hist1h2bf; Hist1h2bn; Hist1h3b; Hist1h4n; Hist2h3c2; Hmgcs1; Hs6st1; I830077J02Rik; Ifngr2; Il13ra1; Il13ra2; Iqgap3; Itgbl1; Itpk1; Kdelr3; Kif21b; Kif2c; Kit; Krt79; Lbh; Lcp1; Lctl; Lgals3; Lipf; Lonrf3; Malt1; Mapkap3; Mcm10; Mcm2; Mfap4;</i></p>                                                                                                                                                                                                                                                                                                                                                                                                                                                                                                                                                                                                                                                                                                                                                                                                                                                                                                                                                                                                                                                                                                                                                                                                                                                                                                                                                                                                                                                                                                                                                                                                                                                                                                                                                                                                                                                                                          |

*Micall2; Mir1901; Mkl2; Mrc2; Ms4a4c; Mstn; Naip2; Ncan; Ncf2; Nedd4l; Nfkb2; Nipal3; Noct; Npl; Nr2c2ap; Nt5dc2; Nup210; Optc; Otop1; Pak1; Pam; Paqr9; Parp8; Pcolce2; Pde7a; Pde7b; Pdxk; Pfkfb4; Phospho1; Pip5k1c; Plcg2; Plcl2; Pld4; Plod1; Plppr4; Plxdc1; Pmepa1; Postn; Prps1; Psmb10; Ptpn1; Ptpn22; Ptpre; Ptpri; Pvr13; Rab29; Rab43; Rad54b; Rasgef1b; Rasl12; Reep4; Rell1; Rnase2a; Rnf122; Rnf128; Rragd; Runx1; Ryr2; S100a8; Saa3; Sell13; Sgms2; Skp2; Slamf9; Slc25a13; Slc41a2; Slc5a7; Slc9a3r1; Sox4; Spp1; Spry3; Sptlc3; Srgn; St14; Stambpl1; Stap1; Syng2; Tcf19; Tcl1b2; Tec; Tfpi2; Tjp2; Tldc1; Tlr9; Tmeff2; Tmem144; Tmem164; Tmem176a; Tmem229b; Tmem86a; Tmem97; Tnfrsf21; Tnfrsf23; Tnip1; Tpd52; Tpm3; Trac; Traj44; Trdn; Trim36; Trp53; Ttyh3; Tubb2a; Ubd; Unc79; Wfdc21; Zmiz1*

| Lung tissue             | Membership genes                                                                                                                                                                                                                                                                                                                                                                                                                                                                                                                                                                                                                                 |
|-------------------------|--------------------------------------------------------------------------------------------------------------------------------------------------------------------------------------------------------------------------------------------------------------------------------------------------------------------------------------------------------------------------------------------------------------------------------------------------------------------------------------------------------------------------------------------------------------------------------------------------------------------------------------------------|
| Cluster 1<br>(9 genes)  | <i>Adam7; Adgre4; <b>Card11</b>; Fbxw15; Gpx5; Hspa1b; Plcb1; Snora36b; Vsig1</i>                                                                                                                                                                                                                                                                                                                                                                                                                                                                                                                                                                |
| Cluster 2<br>(81 genes) | <i>Adams9; Akap12; Ampd3; Arntl; Arrdc2; Asns; Axnd1; Bcar3; Ccnjl; Cdkn1a; Cfd; Ch25h; Clec4d; Cpne8; Creb5; Crem; Crispld2; Csf3; Cyp1a1; Cyp2e1; Dennd4a; F3; Fam124b; Fam160a1; Fpgs; Gadd45g; Gclc; Gfpt2; Gpr157; Gpr50; Hpx; Il1r2; Inhbe; Kcnj8; Lcn2; Lmcd1; LOC105243073; Magea10; Mat1a; Mfsd2a; Miat; Mir5133; Mir877; Mmp8; Mthfd2; Nlrp12; Npas2; Nup210l; Olfr1195; Olfr286; Olfr786; Ovgp1; Pde4d; Pi15; Poteg; Prl7c1; Prss12; Rasd1; Rasgrp3; Rdh12; Retnl; Rhoj; Rnls; Rps15; Rxrg; Sema6b; Serpina3f; Serpina3h; Slc38a4; Slc7a5; Slc9b2; Stk32a; Stk-ps1; Tcf15; Tmem59l; Tnfaip6; Trav12-2; Trpm2; Urb1; Vmn1r6; Zglp1</i> |
| Cluster 3<br>(14 genes) | <i>Card11; Cr2; Dbp; Mir130a; Olfr1271; Olfr1342; Olfr555; Olfr675; Prdm8; Sh3rf2; Supt4b; Tnfsf10; Tspan4; Zscan4b</i>                                                                                                                                                                                                                                                                                                                                                                                                                                                                                                                          |
| Cluster 4<br>(10 genes) | <i>Bcas3os1; C5ar1; Cd300lf; Galnt15; Iigp1; Itih4; Lrtm2; Psg18; Samd5; Slc40a1</i>                                                                                                                                                                                                                                                                                                                                                                                                                                                                                                                                                             |

The *Card11* gene (in red) belongs to Cluster 4 identified from adipose tissue and to Cluster 1 identified from lung tissue as well.

**Supplementary Table 3. Functionally important genes belong to 4 clusters identified from lung tissue**

| <b>Lung tissue gene cluster</b> | <b>Gene</b>     | <b>Phenotypes directly attributed to mutations of this gene</b>                                                                                       | <b>Adipose tissue gene cluster</b> |
|---------------------------------|-----------------|-------------------------------------------------------------------------------------------------------------------------------------------------------|------------------------------------|
| 1                               | <i>Card11</i>   | Abnormal B & T cell proliferation/differentiation<br>Decreased circulating IL-4 & IL-5 levels<br>Lung inflammation<br>Decreased airway responsiveness | 4                                  |
|                                 | <i>Gpx5</i>     | Decreased eosinophils                                                                                                                                 | 1                                  |
|                                 | <i>Hspa1b</i>   | Increased IL-6 secretion                                                                                                                              | Not assigned                       |
| 3                               | <i>Cr2</i>      | Decreased neutrophils & B cells<br>Decreased immunoglobulin level                                                                                     | Not assigned                       |
|                                 | <i>Prdm8</i>    | Increased airway resistance                                                                                                                           | Not assigned                       |
|                                 | <i>Tnfrsf10</i> | Abnormal negative T cell selection,<br>Impaired natural killer cell mediated cytotoxicity                                                             | Not assigned                       |
| 4                               | <i>C5ar1</i>    | Impaired neutrophil recruitment<br>Abnormal humoral immune response                                                                                   | 2                                  |
|                                 | <i>Cd300lf</i>  | Abnormal mast cell physiology<br>Increased IL-4, IL-5 & IL-13 secretion<br>Respiratory system inflammation                                            | 4                                  |
|                                 | <i>Slc40a1</i>  | Increased splenocyte apoptosis                                                                                                                        | 2                                  |

**Supplementary Table 4. Baseline demographics of human subjects enrolled**

---

|                                    | Non-obese controls | Obese controls | Non-obese asthmatics | Obese asthmatics |
|------------------------------------|--------------------|----------------|----------------------|------------------|
|                                    | N = 10             | N = 11         | N = 10               | N = 10           |
| Age, year                          | 53.5 ± 13.6        | 41.4 ± 10.6    | 53.5 ± 15.5          | 58.7 ± 13.9      |
| Male, N                            | 1                  | 4              | 2                    | 4                |
| Body mass index, kg/m <sup>2</sup> | 21.6 ± 1.0         | 28.6 ± 2.3     | 21.1 ± 2.2           | 27.4 ± 2.6       |

---

Data are presented as mean ± standard deviation. N; number.

# Supplementary Figure 1.

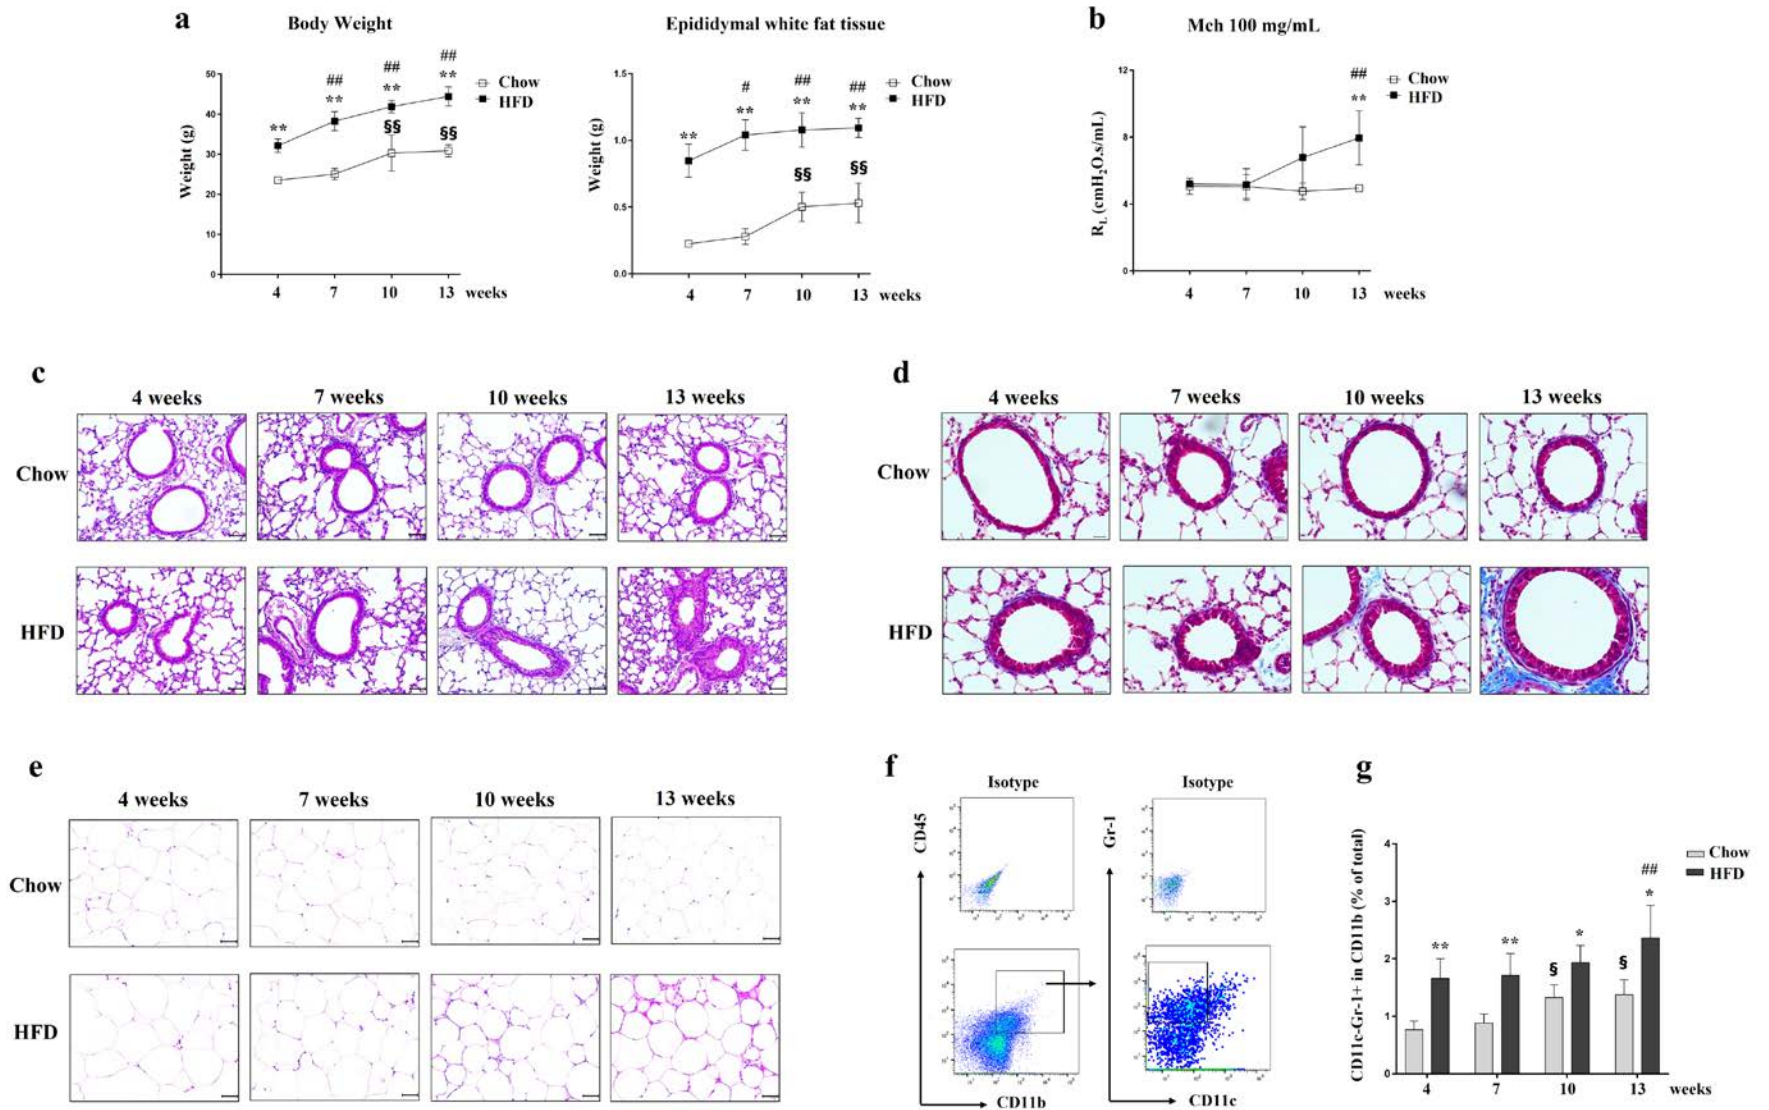



## Supplementary Figure 2.

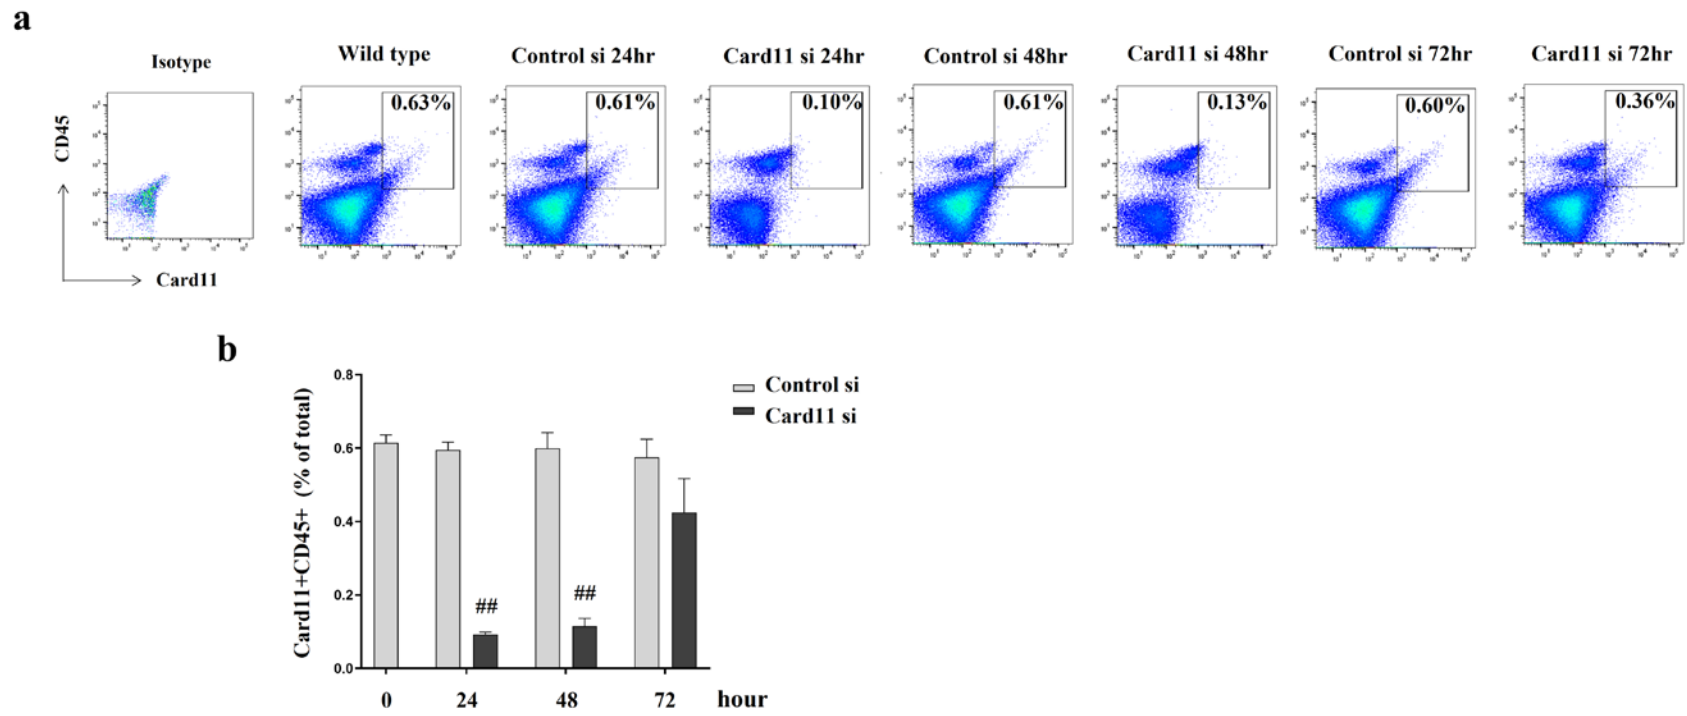

Supplementary Figure 3.

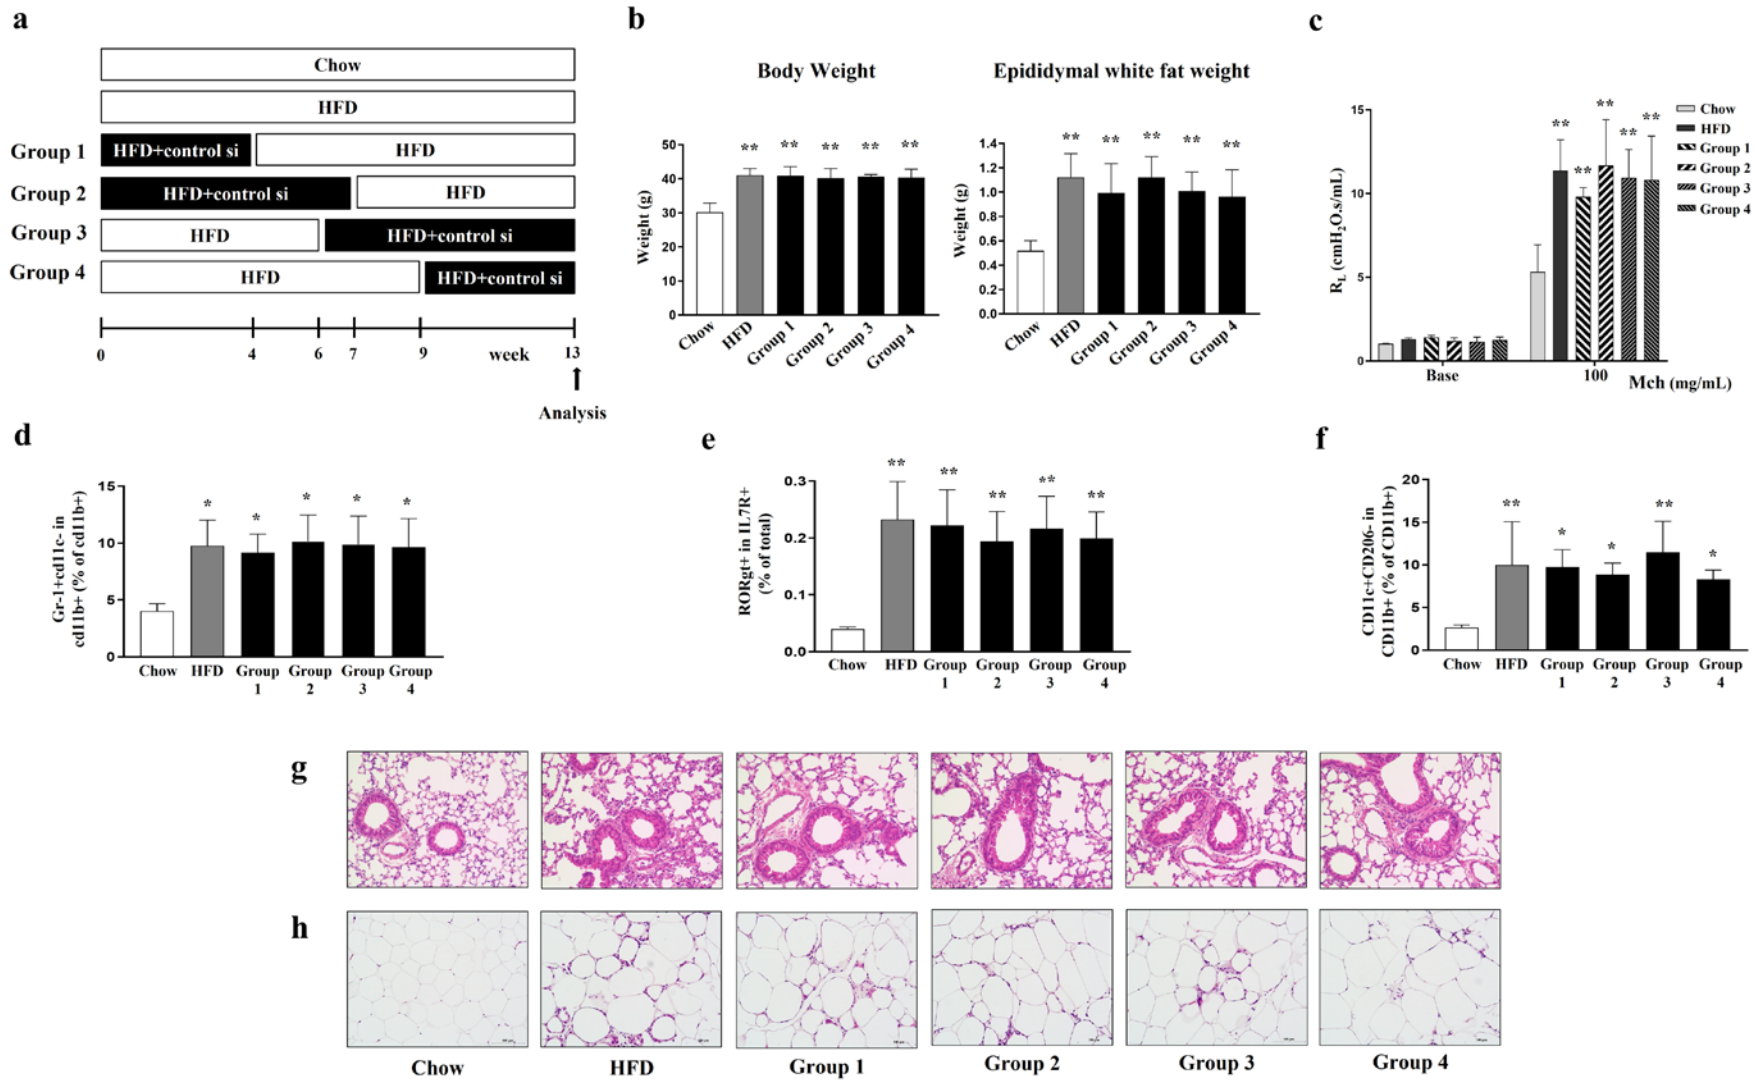

Supplement: 12276_2024_1367_MOESM1_ESM.pdf [file 12276_2024_1367_MOESM1_ESM.pdf]
